# Supplementary material for: Facile Synthesis and Self-Assembly of Amphiphilic Polyether-Octafunctionalized Polyhedral Oligomeric Silsesquioxane via Thiol-Ene Click Reaction
Source: Polymers (Basel). 2017 Jun 28;9(7):251. doi: 10.3390/polym9070251 (PMC6432379; doi:10.3390/polym9070251)
Supplement: Supplementary file 1 [file polymers-09-00251-s001.pdf]

# Supplementary Materials: Facile synthesis and self-assembly of amphiphilic polyether-octafunctionalized polyhedral oligomeric silsesquioxane via thiol-ene click reaction

Yong Xia, Sha Ding, Yuejun Liu, Zhengjian Qi

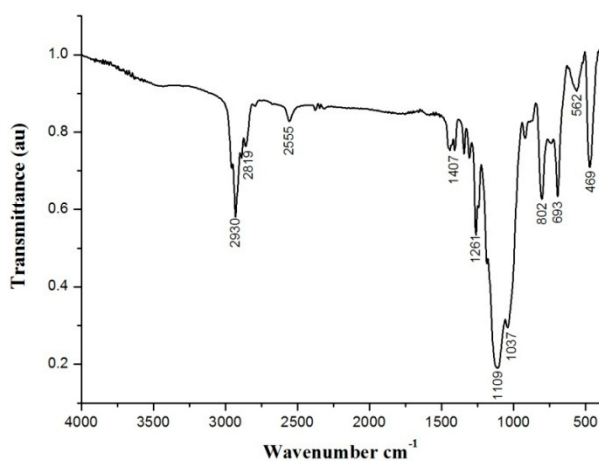

Figure S1 The infrared spectrum of POSS-SH

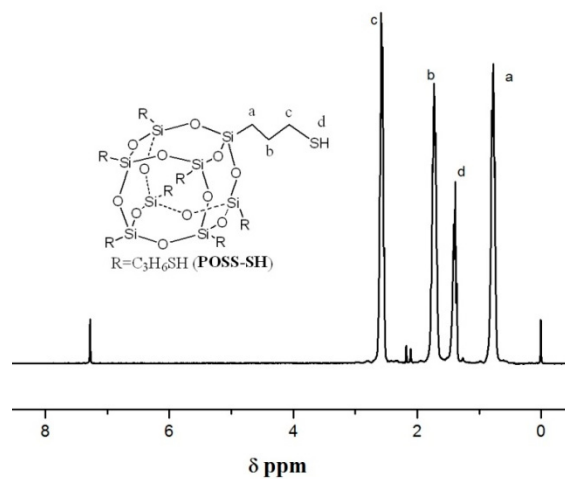

Figure S2 <sup>1</sup>H NMR spectra of POSS-SH

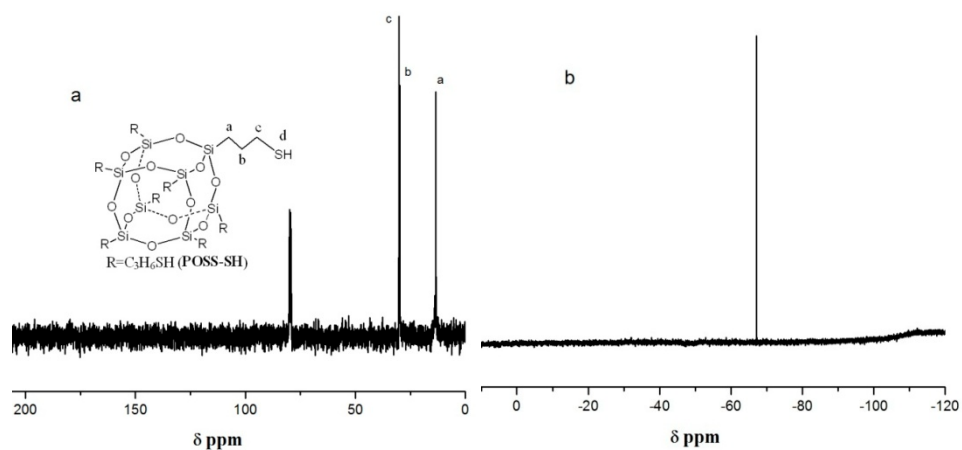

Figure S3  $^{13}\text{C}$  NMR spectra (a) and  $^{29}\text{Si}$  NMR spectra (b) of POSS-SH

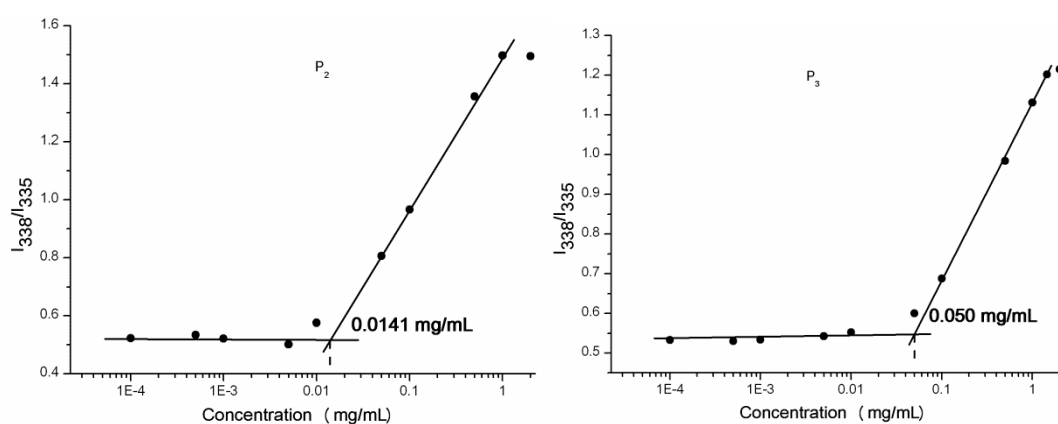

Figure S4 Variation of the intensity ratio ( $I_{338}/I_{335}$ ) as a function of  $P_2$  and  $P_3$  concentrations, the dotted line shows the CMC value.

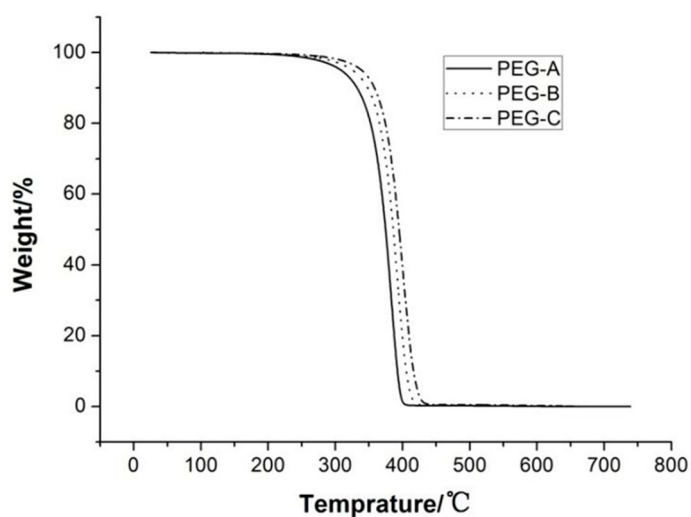

Figure S5 TGA curves of PEG-A, PEG-B, and PEG-C (in  $\text{N}_2$ )

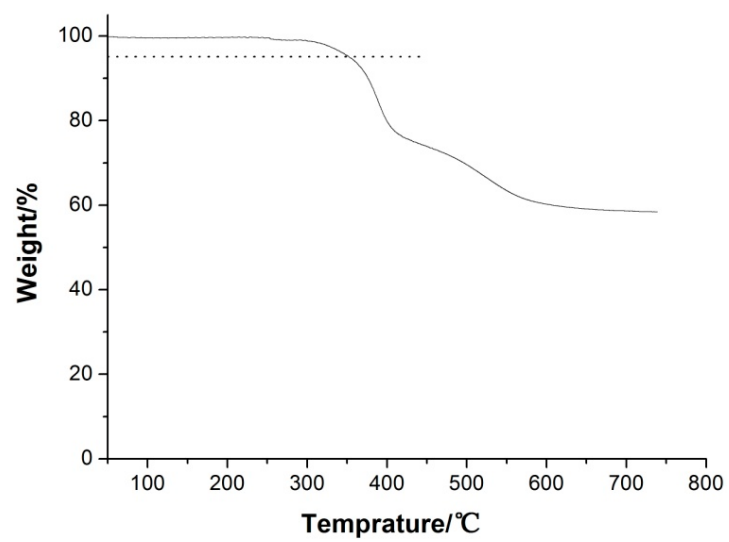

Figure S6 TGA curve of **POSS-SH** (in N<sub>2</sub>)
